# Supplementary material for: Synthesis of Pd/SBA-15 catalyst employing surface-bonded vinyl as a reductant and its application in the hydrogenation of nitroarenes
Source: Royal Society of Chemistry journal article supplement (doi:10.1039/c6ra26811k), 2017-01-01
Supplement: c6ra26811k1.pdf [file c6ra26811k1.pdf]

Supporting information

**The synthesis of Pd/SBA-15 catalyst employing surface bonded vinyl as reductant and its application in the hydrogenation of nitroarenes**

Ying Duan,<sup>ab</sup> Min Zheng,<sup>a</sup> Dongmi Li,<sup>a</sup> Dongsheng Deng,<sup>a</sup> Cuicui Wu<sup>a</sup> and Yanliang Yang<sup>\*a</sup>

<sup>a</sup>. Henan Key Laboratory of Function-Oriented Porous Material, College of Chemistry and Chemical Engineering, Luoyang Normal University, Luoyang 471934, P. R. China. Email: yangyl0410@126.com

<sup>b</sup>. College of Food and Drug, Luoyang Normal University, Luoyang 471934, China

## 1. Additional Results

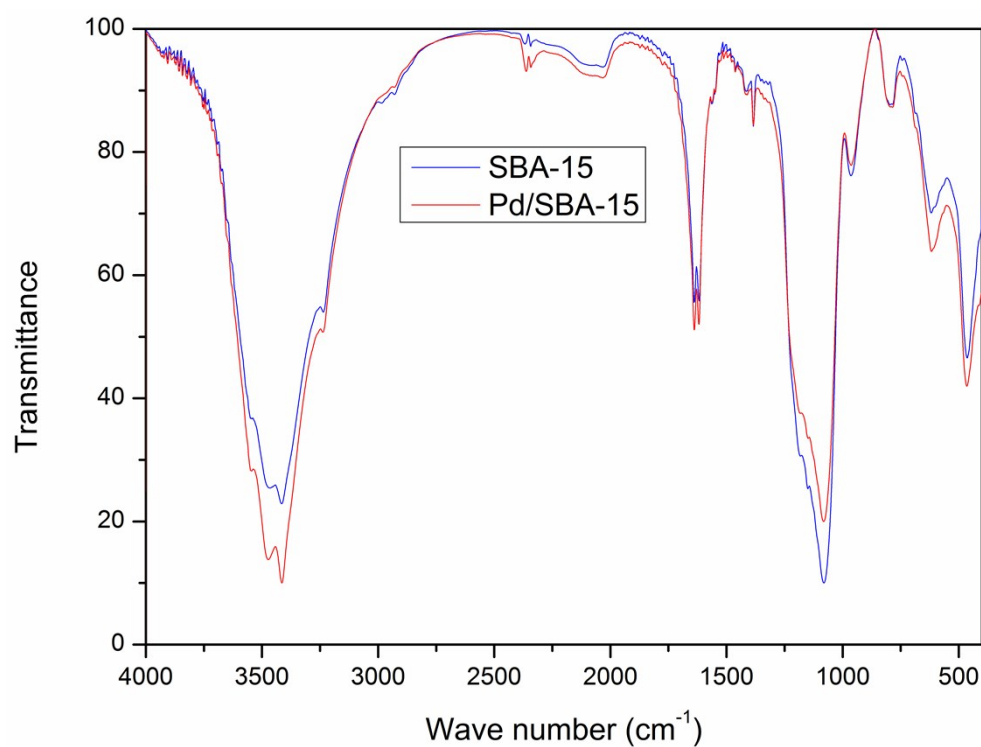

Fig. S1 FT-IR spectrum of SBA-15 and Pd/SBA-15.

**Table S1** The calculated rate constants and TOF for the hydrogenation of aromatic nitro compounds.

| Entry | Substrates           | $k$ (mmol L <sup>-1</sup> min <sup>-1</sup> ) | TOF (h <sup>-1</sup> ) <sup>a</sup> |
|-------|----------------------|-----------------------------------------------|-------------------------------------|
| 1     | Nitrobenzene         | 4.73                                          | 1124                                |
| 2     | 2-Nitrotoluene       | 1.97                                          | 468                                 |
| 3     | 3-Nitrotoluene       | 3.39                                          | 805                                 |
| 4     | 4-Nitrotoluene       | 3.48                                          | 827                                 |
| 5     | 4-Nitrophenylethane  | 2.38                                          | 566                                 |
| 6     | 2-Fluoronitrobenzene | 2.48                                          | 590                                 |

<sup>a</sup> calculated based on the Pd contents determined by ICP-AES.

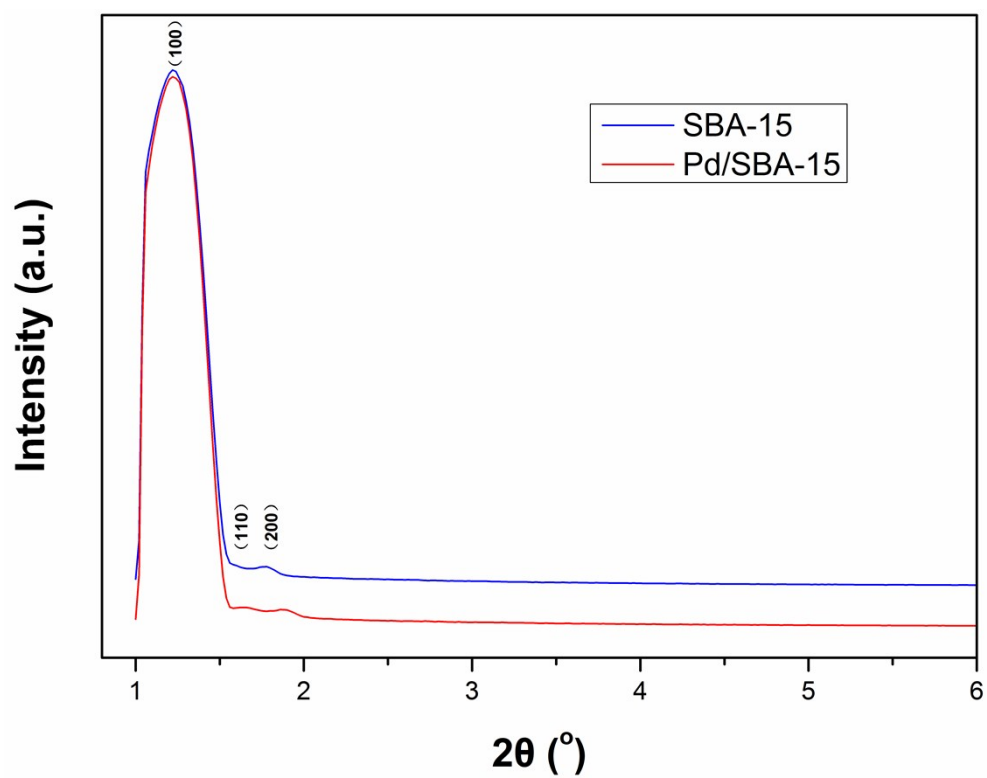

Fig. S2 Small angle XRD pattern of as-synthesized SBA-15 and Pd/SBA-15.

## 2.MS Traces

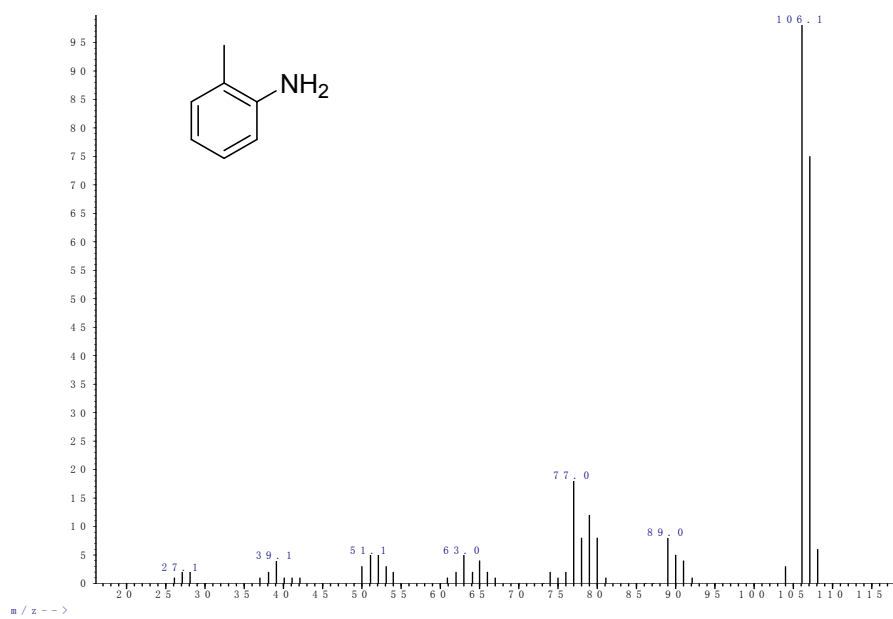

Fig. S3 Mass spectrum of *o*-toluidine.

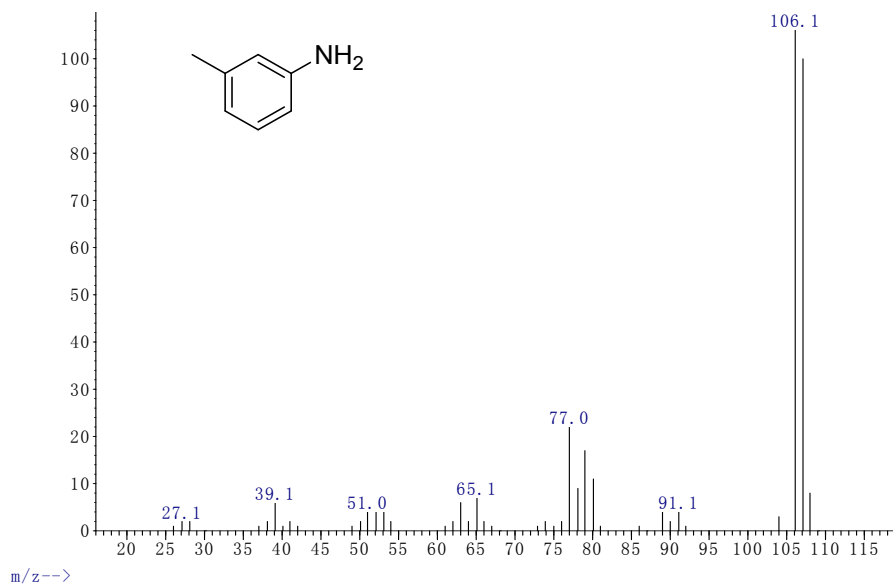

Fig. S4 Mass spectrum of *m*-toluidine.

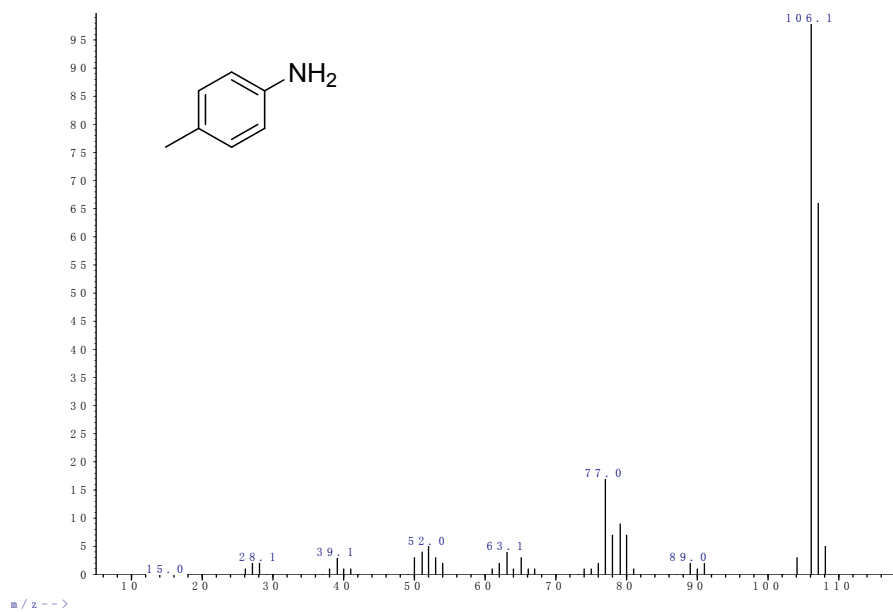

Fig. S5 Mass spectrum of p-toluidine.

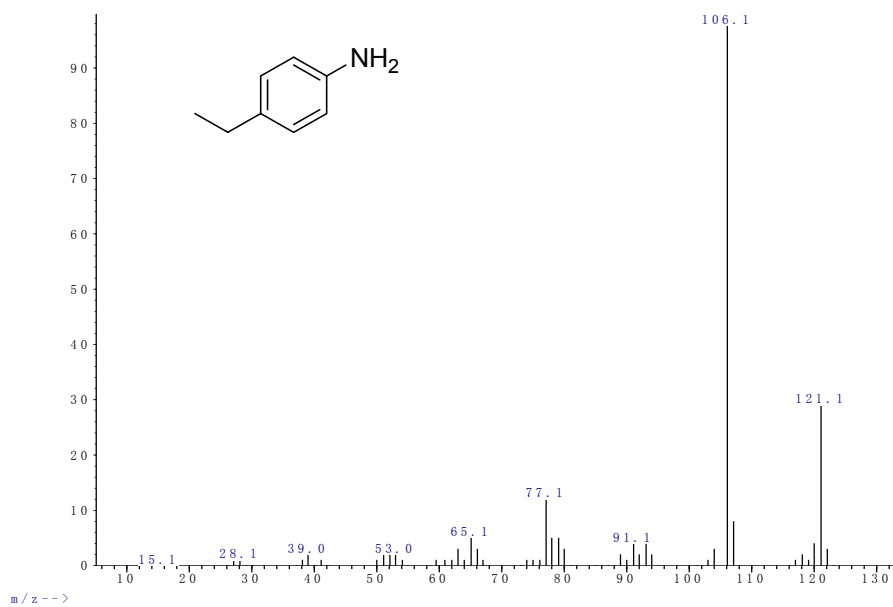

Fig. S6 Mass spectrum of 4-ethylaniline.

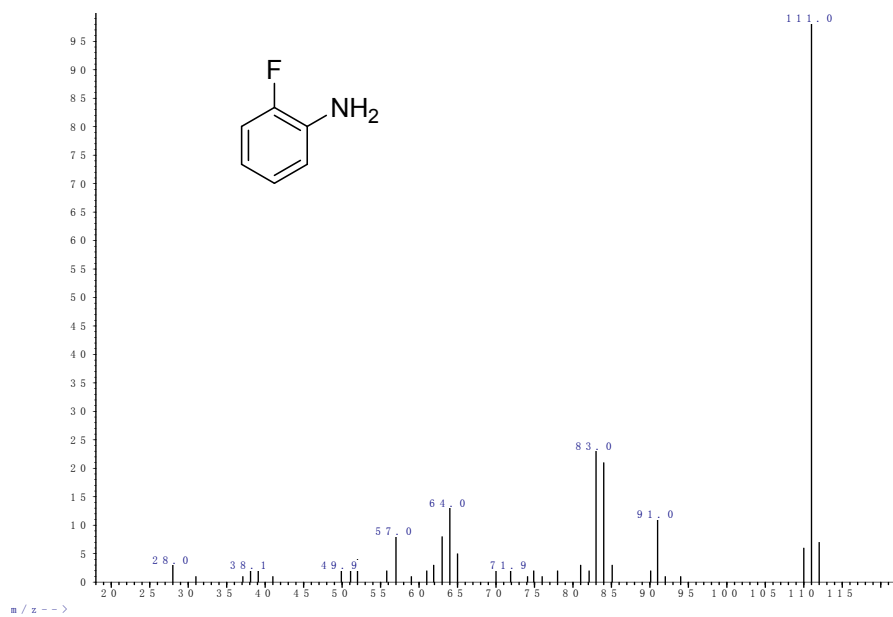

Fig. S7 Mass spectrum of 2-fluoroaniline.
